# Supplementary material for: Plasma proteins and onset of type 2 diabetes and diabetic complications: Proteome-wide Mendelian randomization and colocalization analyses
Source: PubMed Central journal article supplement — Cell Rep Med. 2023 Aug 30;4(9):101174. doi: 10.1016/j.xcrm.2023.101174 (PMC10518626; doi:10.1016/j.xcrm.2023.101174), 2023-08-30
Supplement: mmc1.pdf [file mmc1.pdf]

**Cell Reports Medicine, Volume 4**

**Supplemental information**

**Plasma proteins and onset of type 2 diabetes and  
diabetic complications: Proteome-wide Mendelian  
randomization and colocalization analyses**

**Shuai Yuan, Fengzhe Xu, Xue Li, Jie Chen, Jie Zheng, Christos S. Mantzoros, and Susanna  
C. Larsson**

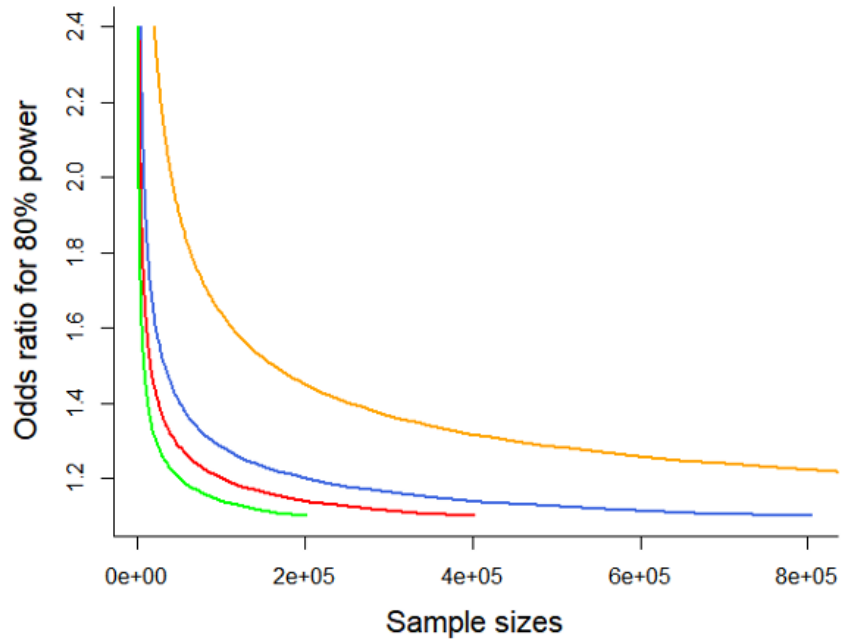

**Figure S1.** Power estimation. The power estimation assumed the disease prevalence of 2% and was performed according to this paper: <https://academic.oup.com/ije/article/42/5/1497/623616>.

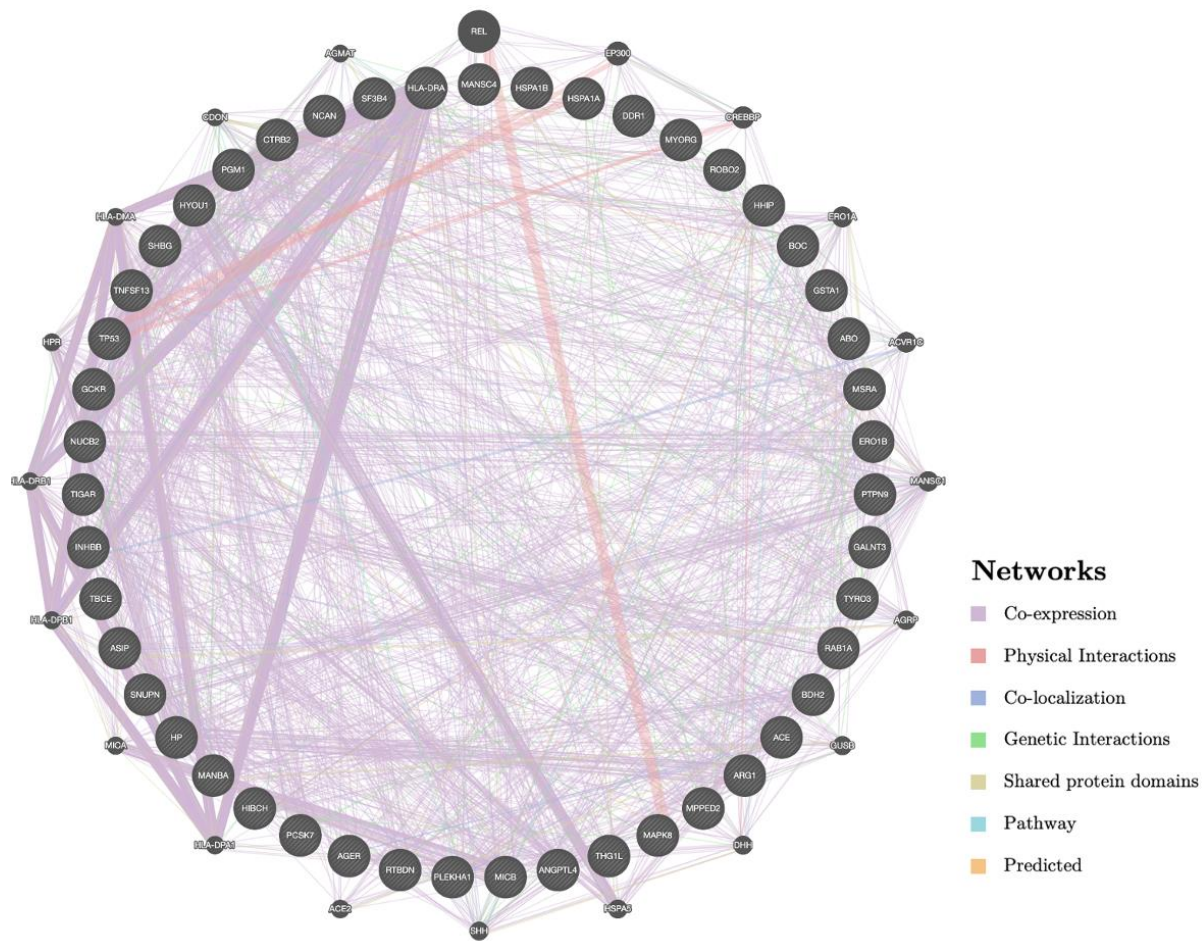

**Figure S2.** Networks of identified proteins associated with type 2 diabetes. The network prediction was based on an online tool: GeneMANIA (<http://www.genemania.org>).

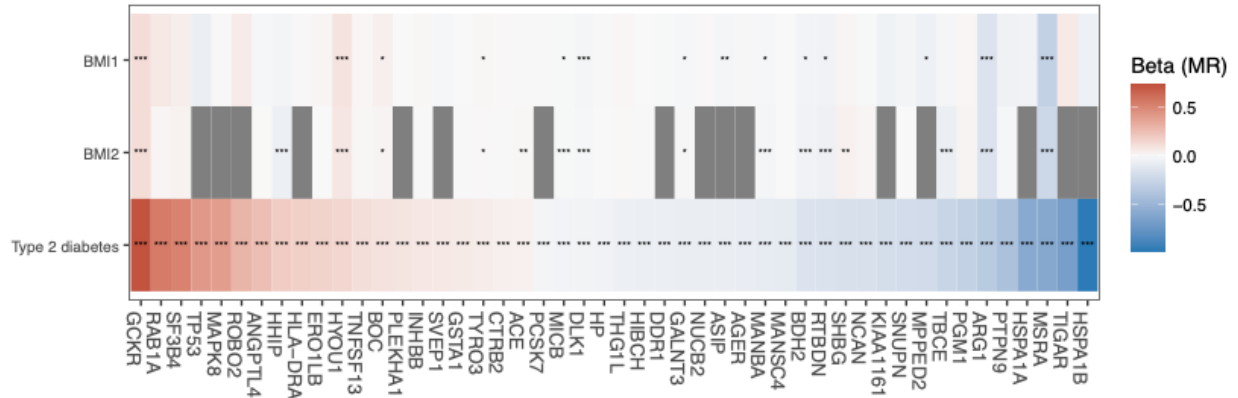

**Figure S3.** Associations of diabetes-associated proteins with body mass index in MR analysis. Results for BMI1 were based on Neale Lab data and that for BMI2 were based on the GIANT consortium data.

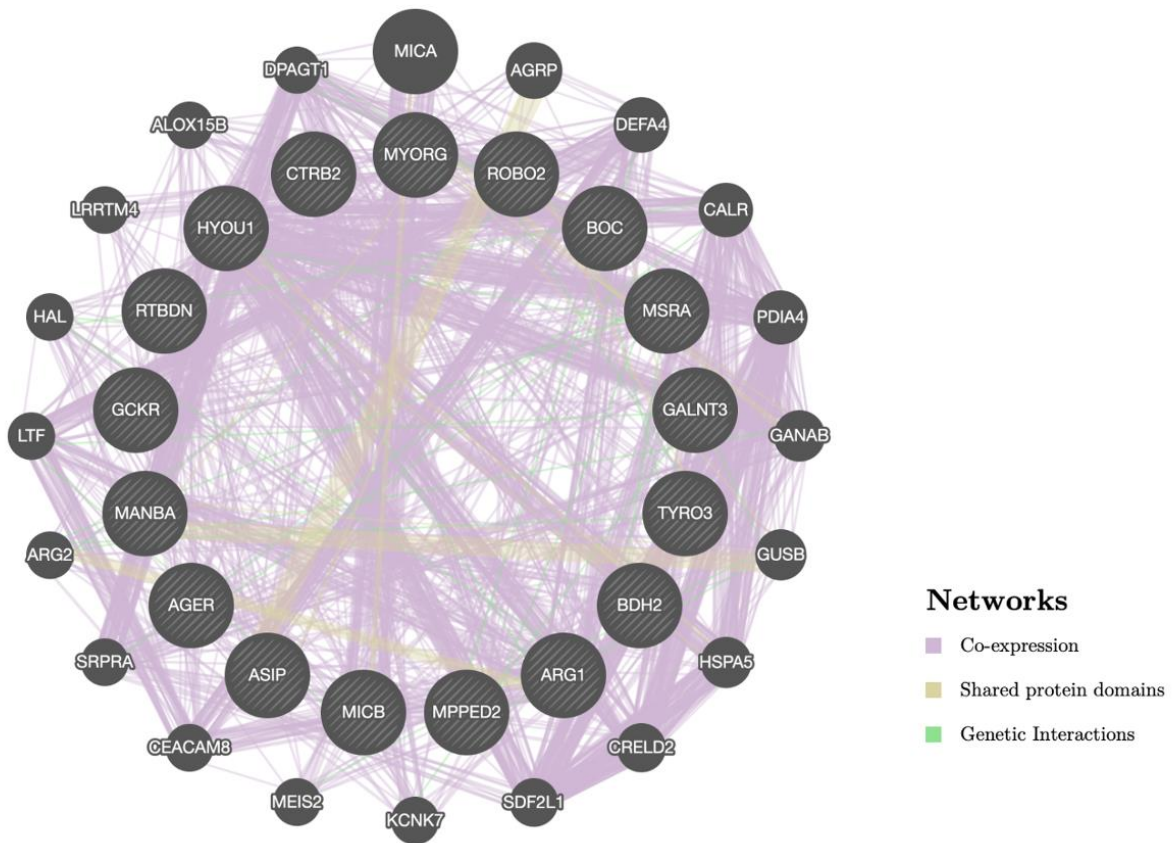

**Figure S4.** Networks of identified proteins in the two-stage network MR analysis. The network prediction was based on an online tool: GeneMANIA (<http://www.genemania.org>).
